# Supplementary material for: Robot-Assisted versus Open Partial Nephrectomy: Propensity-Matched Perioperative Outcomes and Oncologic Safety up to 5 Years
Source: Research Square preprint supplement (doi:10.21203/rs.3.rs-7474859/v1), 2025-09-23
Supplement: Supplementary file 1 [file 2d895d42ad683caedba0a6cd.docx]

Supplymentary materials:
